# Supplementary material for: Maternal Satisfaction and Predictors of Maternal Health Service Provided by Health Extension Workers in Darara District, Southern Ethiopia: A Community Based Mixed Methods
Source: Preprints.org preprint supplement (doi:10.20944/preprints202409.1256.v1), 2024-09-17
Supplement: Supplementary file 1 [file supplementary]

# Annex I: English version questionnaire

**Hawassa University**

**College of Medicine and Health Sciences**

**School of Public Health**

***Questionnaire designed to study the maternal satisfaction with maternal health service provided by rural HEWs and associated factors among the women of the reproductive age in rural Sidama region, Southern Ethiopia, 2020.***

**1. Information sheet**

Hello! My name is ------------------------------------------------------. I am a data collector in a survey being conducted about maternal satisfaction under the College of Medicine and Health Sciences of Hawassa University. The aim of this study is maternal satisfaction with maternal health service provided by rural HEWs and associated factors among the women of the reproductive age in rural Sidama region, Southern Ethiopia, 2020.The purpose of this study is to generate information about the maternal satisfaction among the women of the reproductive age who are living in Sidama region. The study may help stakeholders, policy makers, responsible body, and others to take actions based on the finding. The study comprises various socio-demographic and others questions. You are chosen to participate in this study by chance. Interview will take not more than 30 minutes.

We assure you that there is no risk or harm in participation of this study. All information will be kept confidentially. Name of a participant will not be written or specified. Your privacy will also be protected and no one shall know your response.

There is no incentive or payment for participating in this research. Likewise, findings of the study will show the magnitude of maternal satisfaction and associated factors among the study population. This in turn will help to design effective and appropriate measure to increase utilization of maternal health services.

You have full right whether or not to participate in this study. You may respond to all questions or you may not answer to the questions you don’t want to or you may quit your participation totally at any time you want. You can ask any questions which is not clear for you.

**2. Informed consent**

As to the information given ahead, participating in this study has no risk. In order to attain the objective of the study, your participation is vital. For this reason we are requesting your free will. You are selected randomly to participate in this study and your name will not be written on this form and the information you give will never be shared to others. Your genuine response to the interviews will be very important for the purpose of the study. You have a right to refuse in responding any question or the entire question at any time you want.

I have read this form or it has been read to me in the language I comprehend and understand all condition stated above.

Are you willing to participate in this study?

Yes □ No □

If “Yes" ...proceed with the interview.

If “No” ...........thank you and end.

Name of the principal investigator: Amanuel Yoseph

Cell phone Number - +251-915683578 E mail – [amanuelyoseph45@gmail.com](mailto:amanuelyoseph45@gmail.com)

Name of interviewer___________________ Signature__________

Data of interviewer (Ethiopia calendar) _____/_____/_____

Result of interview: 1. Complete 2. Refused 3. Partially complete 4. Respondent not available

Cheeked by supervisor: Name______________ Signature_________ Data___/_____/____

**Part 1: Socio-demographic characteristics of participants**

| **No** | **Questions** | **Coding Categories** | **Skip** |
| --- | --- | --- | --- |
|  | Age (Incomplete years) | -______________ |  |
|  | Marital status | 1. Single 2. Married 3. Divorced 4. Separated 5. Widowed |  |
|  | Religion | 1.protestant  2.orthodox  3.musilim  4.catholic  5.others |  |
|  | Educational status women | 1. No formal education 2. Elementary 3. High school 4. College and above |  |
|  | Occupational status of women | 1. House wife 2. Employee 3. Farmer 4. Daily laborer 5. Merchant 6. Student 7. Others (specify) _________ |  |
|  | Occupation of husbands | 1. Employee 2. Farmer 3. Daily laborer 4. Merchant 5. Student 6. Others (specify) _________ |  |
|  | Level of education of husbands | 1. No formal education 2. Elementary 3. High school 4. College and above |  |
|  | House hold average monthly income (Ethiopian birr) | .____________ |  |
|  | Health facility distance from home | Hours _______days _______ |  |

**Part 2: Wealth index for rural women in Darara woreda Sidama region, Ethiopia, 2019**

| **S.No.** | **Questions** | **Answers** | | | |  |
| --- | --- | --- | --- | --- | --- | --- |
| 2.1 | Who is the owner of the house? | 1. Me 2. Rental | | 3. Family 4. Others...... | |  |
| 2.2 | Main material of the roof? | 1.Corrugated sheet  2.Grass | | 3.Plastic sheets  4. Others | |  |
| 2.3 | Main material of the floor of the house? | 1.Soil  2.Stone | | 3.Cement  4. Others........ | |  |
| 2.4 | Main material of the exterior of the house made of? | 1.Soil/Mud  2.Stone | | 3.Wood  4. Others................. | |  |
| 2.5 | How many rooms in this household? | --------------[in number] | | | |  |
| 2.6 | How many rooms in this household are used for bed room? | --------------[in number] | | | |  |
| 2.7 | What is the main source of drinking water for members of your household? (More than one answer is possible) | 1.Piped  2.Open well  3.Rain water | 4.Spring  5.River  6. Others.......... | | |  |
| 2.8 | Do you have a toilet | 1. Yes 2. No |  | | |  |
| 2.9 | What kind of toilet facility does most members of your household use? | 1.Ventilated improved pit latrine  2.Traditional latrine | 3.No toilet  4. Others…......... | | |  |
| 2.10 | Do you have a separate kitchen? | 1. Yes | 2. No | | |  |
| 2.11 | Does the household have electric power? | 1.Yes | 2.No | | |  |
| 2.12 | What type of fuel does your household mainly use for cooking? (More than one answer is possible ) | 1.Wood  2.Charkol  3.Biogas | 4.Natural gas  5.Stove  6. Others.......... | | |  |
| 2.13 | Does your household have the following materials? (More than one answer is possible ) | 1.Television  2.Radio  3.Tape  4.Modern Bed  5.Cotton mattress | 6.Stove  7.Water generator  8.Refrigerator  9.Others ---- | | |  |
| 2.14 | Does any member of the household have a mobile phone? | 1.yes  2. No |  | | |  |
| 2.15 | What is the total farm size holding of the household in Hectares? | Private (In Hectars)----- | Rental (In Hectars)---- | | |  |
| 2.16 | Does this household own any livestock, herds, or farm animals? | 1.Yes | 2.No | | |  |
| 2.17 | If yes, how many of the following animals do this household own? | 1.Plough oxen—  2.Fattened ox----  3.Cows----  4.Horse ----  5.Mule----- | 6.Donkey ----  7.Goat----  8.Sheep----  9.Chicken -----  10.Others ---- | | |  |
| 2.18 | Do you have separate rooms for cattle? | 1. Yes 2. No | | | |  |
| 2.19 | Do you have monthly income | 1.yes 2.no | | | |  |
| 2.20 | What is the main source of income for the household? | 1.Agriculture  2.Monthly Salary | | | 3.Trade  4.Others (specify) |  |
| 2.21 | Does any member of this household have a bank or microfinance saving account? | 1. Yes፤ Number ----- 2. No | | | |  |

**Part 3: Obstetrics and gynecology factors**

| **No** | **Questions** | **Coding Categories** | **Skip** |
| --- | --- | --- | --- |
| 3.1 | Age of first marriage? | -______________years |  |
| 3.2 | Number of total pregnancies in lifetime | -______________ |  |
| 3.3 | Number of pregnancies in the last 2 years | -______________ |  |
| 3.4 | Number of births | -______________ |  |
| 3.5 | Do you know obstetric danger signs | 1. Yes 2. No |  |
| 3.6 | If your answer for question number 2.5 is Yes What are obstetric danger signs? (multiple answer is possible) | 1. Swelling of leg/face 2. Vaginal bleeding 3. Reduced/absence of fetal movement 4. Severe head ache 5. Severe abdominal cramp 6. Excessive weight gain 7. Increased BP 8. Severe difficulty of breathing 9. Leakage of fluid without labor 10. Fever 11. Blurring of vision |  |
| 3.7 | What was the condition of your last baby? | 1. Live birth 2. Live birth but died soon after 3. Died before seven day 4. Still birth 5. Others specify_______ |  |
| 3.8 | Previous place of MHs use | 1. At health post 2. Health center 3. hospital |  |
| 3.9 | Do you get training on model family | 1.Yes  2.No |  |
| 3.10 | Are you certified as model family | 1. Yes 2. No |  |
| **Part 4; structure and implementation of health posts**  **Health extension workers related factors** | | | |
| 4.1 | The perceived barrier that affect the service of HEWs? (multiple answer is possible) | 1. Served high population 2. Career structure 3. Incentives 4. Supportive supervision 5. Availability of HEWs in the working area 6. Acceptability by HHs 7. Length of stay |  |
| **Health post related factors** | | | |
| 4.2 | The physical environment of the health post allows privacy and confidential care, including: | 1. The availability of curtains, 2. The availability of screens, 3. Partitions 4. Sufficient bed capacity 5. Electricity 6. Water 7. Toilet 8. Waiting area 9. written, up-to-date protocols 10. Reliable communication methods |  |
| 4.3 | 1. Drugs and supplies were available for family planning | 1. Yes 2. No |  |
| 4.4 | Drugs and supplies were available for ANC | 1. Yes 2. No |  |
| 4.5 | Drugs and supplies were available for labour and delivery, PNC by your preferences. | 1. Yes 2. No |  |

**Part 5: Level of mother’s satisfaction on Health service**

| **Level of mother’s satisfaction on Health service**  (Please fill your opinion by level of agreement with statements; There is no right or wrong answer only express your opinion using the Likert scale; 1-Strongly Disagree, 2 Disagree, 3Neither Agree or Disagree, 4-Agree 5-Strongly agree) | | | ***Strongly Disagree*** | ***Disagree*** | **Sometimes** | **Agree** | ***Strongly agree*** |
| --- | --- | --- | --- | --- | --- | --- | --- |
| **S.N** | |  | ***1*** | ***2*** | **3** | **4** | ***5*** |
| 5.1 | Do you think HEWs visit households frequently? | |  |  |  |  |  |
| 5.2 | HEWs ask your permission before the examination or procedures were performed. | |  |  |  |  |  |
| 5.3 | All women have informed choices in the services they receive, and the reasons for interventions or outcomes are clearly explained. | |  |  |  |  |  |
| 5.4 | 1. HEWs was given the opportunity to discuss their concerns and preferences. | |  |  |  |  |  |
| 5.5 | 1. The HEWs was active listening, asking questions, responding to questions, verifying the understanding of women and their families and supporting women in problem-solving. | |  |  |  |  |  |
| 5.6 | 1. Get service in health post were adequately informed by HEWs about the examinations, actions and decisions taken for their care | |  |  |  |  |  |
| 5.7 | 1. Get service in health post by your need and preference | |  |  |  |  |  |
| 5.8 | 1. Do you think HEWs use appropriate precautions on infection prevention during physical examination | |  |  |  |  |  |
| 5.9 | 1. Satisfied with the health education and information provided by HEWs | |  |  |  |  |  |
| 5.10 | 1. Do you think information provided by HEWs on maternal health service adequate? | |  |  |  |  |  |
| 5.11 | No woman is subjected to mistreatment, such as physical, sexual or verbal abuse, discrimination, neglect, detainment, extortion or denial of services. | |  |  |  |  |  |
| 5.12 | Do you think in Ethiopia training given for HEWs is adequate to provide maternal health services? | |  |  |  |  |  |
| 5.13 | HEW tell me about importance of maternal health services very well. | |  |  |  |  |  |
| 5.14 | Do you think all service provided by HEW was good and acceptable | |  |  |  |  |  |
| 5.15 | Do you think health post open and close standard working hours? | |  |  |  |  |  |

##

## Annex 3; Sidamic Version Information Sheet and Consent Form

**Xawishshunna Sumuu Yoote wodho**

Aneha su’ma’ya Yaamamemo, Hawaasi yuniversite giddo Dagoomu fayyimma goli rosaancho ikkinohura, rosu jeefora xiinxallo loosanni noohura kalaa Mesfiini Yaannisihu xiinxallote hasiisanno mashalaqqe gamba assate daammo. Xiinxallote korkaatino “Ammuuwwu hasatto wonshate Xeena ekisteenshine uyitanno fayyimate owowaantenna garanna fayyimate owowaantenna, fayyimmate mine horonsirate ledo noonsa xaadoshshe la’ateeti”. Ati tenne xinxallora karsamakki lowo geeshshsa xiinxallote kaa’lo assitanno. Korkaatuno ati xiinxallo assineemmo qarqari’rira heeratto/tta daafi’rati. Xiinxalote miila ikkate ate fajjo hasiissannonke. Woleno xiinxallote gaamo ikkate sumuu yinummoro, xiinxallote giddo e’a buuxxanno fajjote dargira malaate assa ikkitanno. Hakkinni aane nooha harumu garinni xa’mo dawaranna fayyimate owowaante aana noohe huluullo, Wolere xaphphoomunni ateta dagoomunna miinju taje, heeshshote amanyootenna, fayyimmate mine horonsirate garanna fayyimma agadhate assatto la’inohunni 20 daqiiqa adhanno. Xiinxallo fayyimmate aana qarra diabbitanno.Ate mashshalaqe xinxallote hajora calla horonsi’neemo. Ate mayimma leelishshanore su’ma lawannore xiinxallote aana diworranni.

**Sumuu yaate taje:** Ani tenne sumuu yaate wodhdho gara nabbabe sa’eno xiinxallo harisannohu nabbabe kuleenna’e xinxallote korkaatanna mixo huwate xiinxallote miila ikkate sumuu yoommota woroonni noo malaatinni buuxisiiseemmo.

Sumuu yoommo Sumuu diyoommo

Xa’maanchu malaate _______________________ Barra ______________________

**Xiinxallote Massagaanchi: Kalaa: Mesfiini Yaannisiho**

**Teesso:** Hawaassa,Bilbilisi Kiiro: +251-916-66- 5228, E-mail: [ymesf2011@gmail.com](mailto:ymesf2011@gmail.com)

**Xiinxallote miila ikkate fajjoottanke daafira lowo geeshsha galateemmohe!**

## Annex 4; Questionnaire in Sidamic version

| **BADOOSHSHE** | |  |  |
| --- | --- | --- | --- |
| **Qabale** | _________________ | Xa’mo Assini Barra(BB/AA/DD)____/____/_____ | |
| **Olluu Bido** | _________________ | Hanafote saate | ___________________ |
| **Miniwiilchu** | _________________ | Jeefote saate | ___________________ |

**Haruma** – woroonni noo dawaro dawarri garinni doorte qunqumi, fanu dargirano harancho xawado qaale borreessi.

**Gafa 1: Dagoomunna Miinju Taje**

| **T.K** | **Xa’mo** | **Dawaro** | **Sa’i** |
| --- | --- | --- | --- |
|  | Dirikki me’eho | ____________dirooti |  |
|  | Adhamate gara | 1. Adhantinokite 2. Adhantinote 3. Minaanna shiidhinote 4. Adhame tirooma |  |
|  | Amanokki hiteneeti? | 1.kirstaanaho  2.orthodoksete  3.isilaamaho  4.kaatolikete  5.wole xawisi |  |
|  | Rosiki deerri mageeshaati? | 1. Nabawana boreesa didandiitano 2. Nabawana boreesa dandiitano 3. umi dirimi roso rossino(1-8) 4. layinki dirimi roso gudino(9-12) 5. Collejje/ yuniversite maassantino |  |
|  | Loosikki qeecha? | 1. Mini amaati/Dino’e 2. Rosaachote 3. Mangistete loosanchooti 4. Baato loosire galeema 5. Baru loosanchooti 6. Daddallanchoho 7. wolere (xawisi) __________ |  |
|  |
|  |
|  |
|  |
|  |
|  |
|  |
|  | Minaannikki Rosu deerri? | 1. Nabawana boreesa didandiitano 2. Nabawana boreesa dandiitano 3. umi dirimi roso rossino(1-8) 4. layinki dirimi roso gudino(9-12) 5. Collejje/ yuniversite maassantino |  |
|  | Minaannikki loosi maati? | 1.Mini amaati/Dino’e  2.Rosaachote  3.Mangistete loosanchooti  4.Baato loosire galeema  5.Baru loosanchooti  6.Daddallanchoho  7.wolere (xawisi) __________ |  |
|  | Aganunni mageeshshi e’o afidhdhinanni? | birreeti |  |
|  | Fayyimmate (xeena) keellu mageeshshsa fafanno? | Sa’aatenna____daqiiqa |  |

**Gafa 2: Wealth index for rural women in Darara woreda Sidama region, Ethiopia, 2019**

| **T.K** | **Xammo** | **Dawaro** | | | |  |
| --- | --- | --- | --- | --- | --- | --- |
| 2.1 | Minu ayiiho? | 1. aneho 2.baantooniho | | 3. maateeho 4. wolere...... | |  |
| 2.2 | Minunihu qalchu mayiini loonsooniho? | 1.siwiilu qafichini  2.hayiisoteni | | 3.lastikete qaafichini  4. wolere xawisi……… | |  |
| 2.3 | Minu uyiiladi mayiiniho? | 1.bushaho  2.kinchoho | | 3.simintote  4.wole xawisi........ | |  |
| 2.4 | Minu gobayiido mayiini losamino? | 1.bushuni/sabuni  2.kinchuni | | 3.haquni  4. wole xawisi................. | |  |
| 2.5 | Me’u holgi no? | --------------[kiiroteni] | | | |  |
| 2.6 | Me’e holgeeta goxate horoonsidhinanhu? | --------------[kiiroteni] | | | |  |
| 2.7 | Angani waa mamiini horoonsidhinani? (mitu ale doora dandiinani) | 1.baanbuni  2.bueteni  3.xeenu waa | 4.miiceteni  5.laguni  6. wole xawisi.......... | | |  |
| 2.8 | Shumate mini noohe? | 1.ee 2.deeni |  | | |  |
| 2.9 | Shumate mini hiitooho ? | 1.VIP  2.buduniho | 3.shumate mini dinonke  4. wole xawisi …......... | | |  |
| 2.10 | Sagale qishinani bayiichi minini baxinoho? | 1. ee | 2.deeni | | |  |
| 2.11 | Caabichu noonne? | 1.ee | 2.deeni | | |  |
| 2.12 | Hiitene wolqaata lowo yana sagale qishirate horoonsidhinanti? (mitu ale doora dandiinani) | 1.haqe  2.kinchu kasale  3.Biogase | 4.kalaqamu gase  5.stoove  6. wole xawisi.......... | | |  |
| 2.13 | Kuni uduunchi heerane? (mitu ale doora dandiinani ) | 1.Televisione  2.Radone  3.Teepe  4.daalasu  5.fuutu frashe | 6.Stoove  7.waayi generatere  8.waa qiisanori  9. wole xawisi ---- | | |  |
| 2.14 | Bilblu noohu no minki maate gido? | 1.ee  2.deeni |  | | |  |
| 2.15 | Irshiki batigne bageeshiho (hekitaareteni)? | Umiyahu……… | Kunataroomohu……………. | | |  |
| 2.16 | Mini saada noone ? | 1.ee | 2.deeni | | |  |
| 2.17 | Xamo 2.16 ee yiitore kuri gido hiikuriiti noohehu? | 1.bootu—  2.handu----  3.saa----  4.farashu ----  5.gaango----- | 6.harchu ----  7.meichu----  8.gerechu----  9.lukichu -----  10. wole xawisi ---- | | |  |
| 2.18 | Saadate baxino mini no? | 1. ee 2. deeni | | | |  |
| 2.19 | Afidhinaniti e’o heedhanone? | 1.ee 2.deeni | | | |  |
| 2.20 | Roorenka e’o afidhinanihu mayiiniti? | 1.gatuniiti  2.aganu baatooshini | | | 3.dadaluni  4. wole xawisi |  |
| 2.21 | Mini gido bankete/mikro finansete dafitari noohu no? | 1. ee 2. deeni | | | |  |

**Gafa 3: Wolere Ammuuwwu hasatto Qottisaanore**

| **T.K** | **Xa’mo** | **Dawaro** | **Sa’i** |
| --- | --- | --- | --- |
| 3.1 | Adhamitta waro dirikki me’eho? | -______________dirooti |  |
| 3.2 | Me’ege godowu gatihe? | -______________ |  |
| 3.3 | Sa’i 2 diri giddo Me’ege godowu gatihe? | -______________ |  |
| 3.4 | Me’e ilootta? | -______________ |  |
| 3.5 | Godowinni noo amuuwi aana jaddo abbitara dandiitanno malaata egentinoonni? (Mitu aleenni doora dandiinanni) | 1. Lekkate darshe 2. Otootote mundaa 3. Godowu gido qaaqu milimo ajja/hooga 4. Jawaata umu damuume 5. Jawaata godowu gamme 6. Deera sa’e dumma 7. Mundeete xiiwo lexxa 8. Folate dandoo hooga 9. Leakage of fluid without labor 10. Bissu iibabbo 11. Ille siphi siphi assa |  |
| 3.6 | Albiidi qaaqikki gari hiitooho? | 1. Lubote noohu illamino 2. Lubote noohu illame shiima yana gedensaani reeno 3. Lamallu bari albaani reeno 4. Reenohu ilamino 5. Wollere xawisi_______ |  |
| 3.7 | Albaani ammuwunita fayimatte horro hiiko horoonsiratta? | 1. Xeena keelaho 2. Fayyimatte xaawira |  |
| 3.8 | Modellete yinani summa afiroota? | 1. E’ee 2. Dee’nni |  |
| **Gafa 4; Xeena ekisteeshiinette loosaasine ledo xaadino korkaata** | | | |
| 4.1 | Xeena ekistenshiine uyitano horro ajishanori/hoolanori(mitu aleeni qolla dandiinani) | 1. Lowo dagara horo aa 2. gafu laxo 3. kakaooshu baatooshe 4. kaalote towaango 5. xeena ekstenshiinete losaasine loosu oliira afama 6. mini mani fajo afira 7. Keshinani yana |  |
| **Xeena keelu ledo xaadino korkaata** | | | |
| 4.2 | Xeena keelu olii calimana fojo agaranoho | 1. Diphinani udano /hansoolu heera 2. Dukko heera 3. Badooshu heera 4. Ikkadu daalasi heera 5. Caabichu horo 6. wayi 7. shumate mini no 8. agadhinani/ofolinani bayichi 9. written, up-to-date protocols 10. dancha hasaawu doogo |  |
| 4.3 | Maatete mixora ikano xagichina uduunichi no | 1. E’ee 2. deenni |  |
| 4.4 | ilate albiidi horora ikano xagichina uduunichi no | 1. E’ee 2. deenni |  |
| 4.5 | Ilani woyitena ilate gedensaani uyiinani horora ikano xagichina uduunichi no | 1. E’ee 2. deenni |  |

**Gafa 5: fayimate horo aana amuuwu hasato wommate deera**

| **fayimate horo aana amuuwu hasato wommate deera**  (Please fill your opinion by level of agreement with statements; There is no right or wrong answer only express your opinion using the Likert scale; 1-Strongly Disagree, 2 Disagree, 3Neither Agree or Disagree, 4-Agree 5-Strongly agree) | | | ***Lowo geya sumuu diye didiyeema*** | ***Sumuu diyeema*** | **Sometimes** | **Sumuu yeema** | ***Lowo geya sumuu yema*** |
| --- | --- | --- | --- | --- | --- | --- | --- |
| **S.N** | |  | ***1*** | ***2*** | **3** | **4** | ***5*** |
| 5.1 | Xeena ekstenshiine woma woyite minira dagano | |  |  |  |  |  |
| 5.2 | Xeena ekistenshiinete loosasin horo uyitannera balaxe kinne fajo xamitano. | |  |  |  |  |  |
| 5.3 | Baalunku amuuwi uyinani horo mayiira uyinaniro afino | |  |  |  |  |  |
| 5.4 | 1. Xeena ekisteenshiinete loosaasine hasinanirich daafira hasaanbani gede kayo uyitano | |  |  |  |  |  |
| 5.5 | 1. Xeena ekisteenshiinete loosaasine kulinanire maciishitano, xamo xamitano, tumono qolitano, amuuwu wodanchinoro buuxanona meetu qara tirate kaalo assitano | |  |  |  |  |  |
| 5.6 | 1. Xeena keelaho horo daafira Xeena ekisteenshiinete loosaasine ikadu garini kulitano, | |  |  |  |  |  |
| 5.7 | 1. Xeena keelaho hasidhinanina doodhitini hro afidhinani | |  |  |  |  |  |
| 5.8 | 1. Xeena ekisteenshiinete loosaasine uyitano rosina duduwi ikadoho | |  |  |  |  |  |
| 5.9 | 1. Xeena ekstenshiine horo uyitano yanara adi adi gawajoni agarano uduunicho horoonsidhano yite hedata | |  |  |  |  |  |
| 5.10 | Mite amarano jado iilite diegentinose, hationo manimate aana siimu aana woyi xono. | |  |  |  |  |  |
| 5.11 | Xeena ekisteenshiinete loosaasine amuuwu horo lowo geisha kulitano . | |  |  |  |  |  |
| 5.12 | Xeena ekisteenshiinete loosaasine uyitano horo danchate yite hedata | |  |  |  |  |  |
| 5.13 | Etiyopiyu gido xena ekistenshinate uyinonihu rosu ikadoh yite hedata | |  |  |  |  |  |
| 5.14 | Xeena ekistenshiine uyitanoti womanti horo hagiirisiisanota labanohe | |  |  |  |  |  |
| 5.15 | Xeena keelu wonka woyte yanateni faname cufamano yite hedata | |  |  |  |  |  |
